# Supplementary material for: Halide assisted formation of polymeric ethylenediaminetetraacetato lead(ii) complexes
Source: Royal Society of Chemistry journal article supplement (doi:10.1039/c7nj00611j), 2017-01-01
Supplement: c7nj00611j1.pdf [file c7nj00611j1.pdf]

## Halide assisted formations of polymeric ethylenediaminetetraacetato lead(II) complexes

Jun-Wei Dai, Jian-Mei Zheng, Hai-Yan Li, Jin-Mei Zhou, Xin Dong,\* Zhao-Hui Zhou\*

*State Key Laboratory of Physical Chemistry of Solid Surfaces, Department of Chemistry, College of Chemistry and Chemical Engineering, Xiamen University, Xiamen, 361005, China, Fax: +86 592 2183047; Tel: +86 592 2184531; E-mail: zhzhou@xmu.edu.cn*

|                                                                                                                                                     |   |
|-----------------------------------------------------------------------------------------------------------------------------------------------------|---|
| <b>Fig. S1</b> Schematic description of the equivalent topology framework with a 5-connected uninodal SP type 2-periodic net topological motif..... | 2 |
| <b>Fig. S2</b> Schematic description of the equivalent topology framework with a 6,8-connected dinodal topological motif.....                       | 2 |
| <b>Fig. S3</b> 2D layer of $Pb_n[Pb(edta)Pb(H_2O)Cl]_{2n} \cdot 2nH_2O$ ( <b>3</b> ) in the view parallels to the ab plane .....                    | 3 |
| <b>Fig. S4</b> Hydrogen bonds in $Pb_n[Pb(edta)Pb(H_2O)Cl]_{2n} \cdot 2nH_2O$ ( <b>3</b> ) in the view parallels to the ac plane.....               | 3 |
| <b>Fig. S5</b> Schematic description of the equivalent topology framework with a 4,5,6-connected 3-nodal topological motif .....                    | 3 |

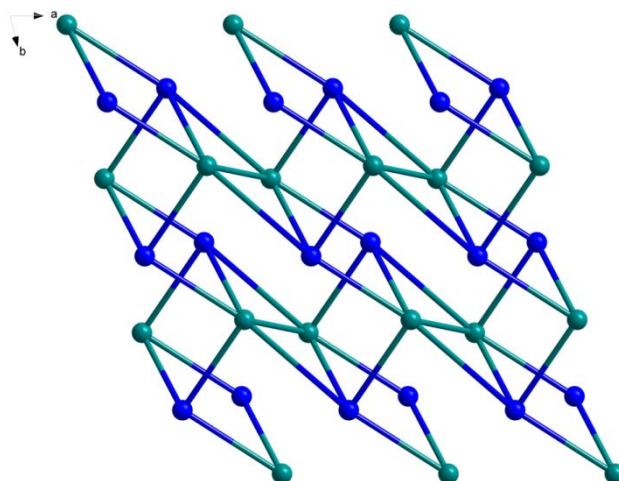

**Fig. S1** Schematic description of the equivalent topology framework with a 5-connected uninodal SP type 2-periodic net topological motif considering the Pb(1)-edta mononuclear units and Pb(2) atoms as connected nodes in **1**. Color codes: sky blue for Pb(1)-edta mononuclear units 5-connected nodes, green for the Pb(2) 5-connected nodes.

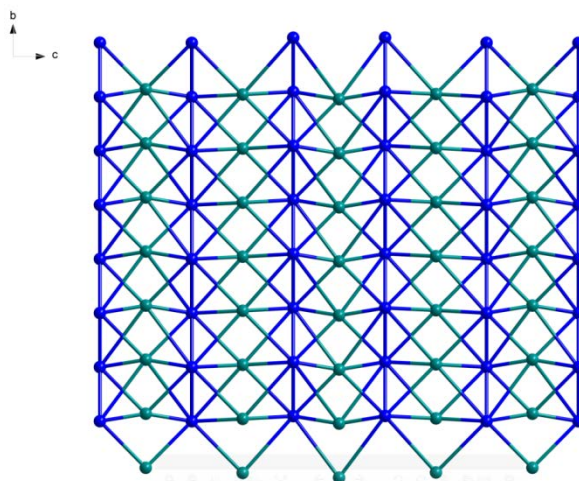

**Fig. S2** Schematic description of the equivalent topology framework with a 6,8-connected dinodal topological motif considering the Pb(1)-edta, Pb(3)-edta mononuclear units and Pb(2), Pb(4) atoms as connected nodes in **2**. Color codes: sky blue for Pb(1)-edta and Pb(3)-edta mononuclear units 8-connected nodes, green for the Pb(2) and Pb(4) 6-connected nodes.

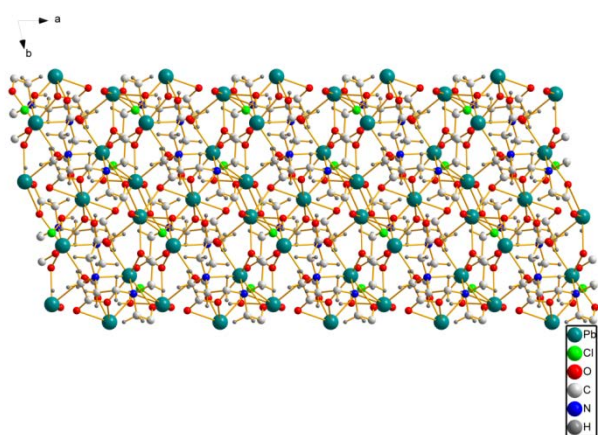

**Fig. S3** 2D layer of  $\text{Pb}_n[\text{Pb}(\text{edta})\text{Pb}(\text{H}_2\text{O})\text{Cl}]_{2n} \cdot 2n\text{H}_2\text{O}$  (**3**) in the view parallels to the  $ab$  plane

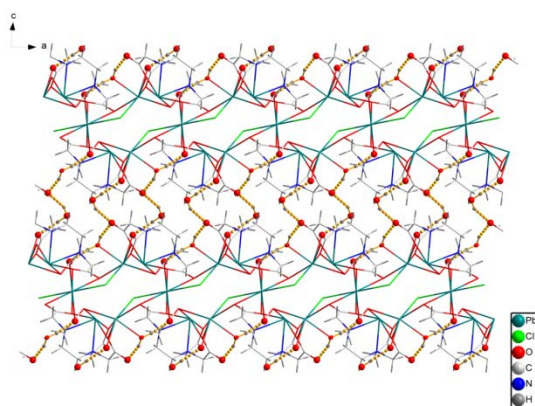

**Fig. S4** Hydrogen bonds in  $\text{Pb}_n[\text{Pb}(\text{edta})\text{Pb}(\text{H}_2\text{O})\text{Cl}]_{2n} \cdot 2n\text{H}_2\text{O}$  (**3**) in the view parallels to the  $ac$  plane

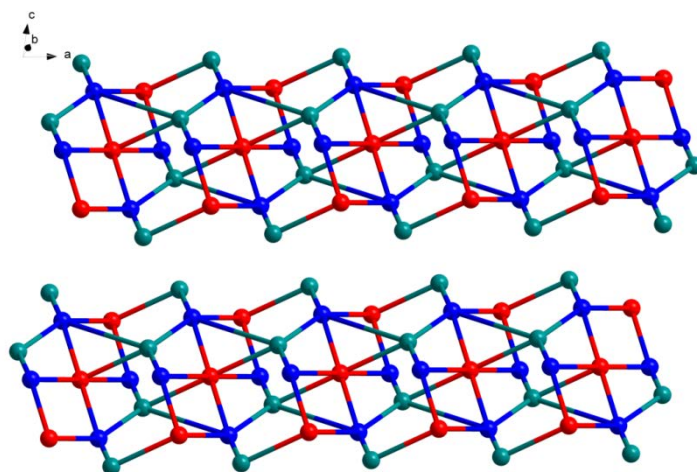

**Fig. S5** Schematic description of the equivalent topology framework with a 4,5,6-connected 3-nodal topological motif considering the Pb(1)-edta mononuclear units, Pb(2) and Pb(3) atoms as connected nodes in **3** and **4**. Color codes: sky blue for Pb(1)-edta mononuclear units 5-connected nodes, green for the Pb(2) 4-connected nodes, red for the Pb(3) 6-connected nodes.
